# Supplementary material for: The evidence for pharmacist care in outpatients with heart failure: a systematic review and meta‐analysis
Source: PubMed Central journal article supplement — ESC Heart Fail. 2021 Jul 8;8(5):3566–76. doi: 10.1002/ehf2.13508 (PMC8497358; doi:10.1002/ehf2.13508), 2021-07-08
Supplement: EHF2-8-3566-s001.pdf [file EHF2-8-3566-s001.pdf]

Schumacher PM et al. The evidence for pharmacist care in outpatients with heart failure: a systematic review and meta-analysis. *ESC Heart Failure*

**Table S1** Summary characteristics of the 24 included RCTs

| First Author          | Year | Country | Number of HF patients | Observation period | Type of patients (recruitment site)                                   | Site of intervention | Type of intervention (IV)                                                                                                                                                                                                                                                                                                                                                                                                                                          | Persons performing intervention                                          | Outcomes/Objectives (P=primary, S=secondary, CG= control group, IG= intervention group)                                                                                                                                                                  | Intervention effect                                                                                                                                                                                                                                                                                                                                                                                                                                                                                                                                                                                                            |
|-----------------------|------|---------|-----------------------|--------------------|-----------------------------------------------------------------------|----------------------|--------------------------------------------------------------------------------------------------------------------------------------------------------------------------------------------------------------------------------------------------------------------------------------------------------------------------------------------------------------------------------------------------------------------------------------------------------------------|--------------------------------------------------------------------------|----------------------------------------------------------------------------------------------------------------------------------------------------------------------------------------------------------------------------------------------------------|--------------------------------------------------------------------------------------------------------------------------------------------------------------------------------------------------------------------------------------------------------------------------------------------------------------------------------------------------------------------------------------------------------------------------------------------------------------------------------------------------------------------------------------------------------------------------------------------------------------------------------|
| Azad N <sup>1</sup>   | 2008 | Canada  | 91                    | 6 weeks + 6 months | Outpatients: Referred from hospital or community to outpatient clinic | Outpatient clinic    | 1) Optimize medical care;<br>2) Exercise program with educational counselling and dietary management.<br><br>12 visits over 6 weeks.                                                                                                                                                                                                                                                                                                                               | physician, nurse, dietitian, physio-therapist, social worker, pharmacist | P: Changes in scores of MLHFQ (QoL).<br>S: Changes in scores of - SF-36 (QoL)<br>- Mini-Mental (MMSE)<br>- 15-item Geriatric Depression Scale (GDS)<br>- Physical self-maintenance Scale PSMS);<br>Survival and health service utilization over 6 months | P: No sign. difference in MLHFQ-scores (IG vs. CG;p=0.470).<br>S: SF-36: n.a.; MMSE: No sign. difference; GDS: No sign. difference; PSMS: No sign. difference (IG vs. CG; p=0.321);<br>No sign. difference in survival (IG vs. CG; p=0.218);<br>Sign. increase in mean no. of cardiologist visits in IG (IG vs. CG; p<0.001);<br>Sign. increase in mean no. of family MD visits in IG (IG vs. CG; p=0.018);<br>Significant increase in mean no. of HF hospitalizations in IG (IG vs. CG; p=0.019);<br>No sign. difference in mean no. of all-cause hospitalizations (IG vs CG; p=0.16).                                        |
| Barker A <sup>2</sup> | 2012 | AUS     | 120                   | 6 months           | Inpatients: hospital                                                  | Patient home         | 1) Post-discharge home medication review to check if medication is used as prescribed and followed evidence-based guidelines;<br>2) Education provided about incorporating medication in daily routines;<br>3) Check if appointments at local physicians were kept;<br>4) Identification of expired medication;<br>5) Information of community pharmacist on medication regimen of participant.<br><br>3 appointments: 96 h, at 1, and at 6 months post-discharge. | Study pharmacist                                                         | P: Number of deaths;<br>All-cause readmission rate;<br>Inpatient days of all-cause hospitalizations;<br>HF hospitalizations.<br>S: QoL: Changes in scores of - SF-36<br>- AQoL at 1 and 6 months after enrollment.                                       | P: No sign. difference in number of deaths (IG vs. CG; HR=1.41, 95% CI 0.5-3.97; p=0.514);<br>No sign. difference in all-cause readmission rate (IG vs. CG; IRR=1.18, 95% CI 0.78-1.79; p=0.417);<br>Significant increase in Inpatient days of all-cause hospitalization in IG (IG vs. CG; IRR=1.25, 95% CI1.06-1.48; p=0.009);<br>Significant increase in inpatient days of HF hospitalization in IG (IG vs. CG; IRR=2.34, 95% CI 1.8-3.05; p=0.000).<br>S: SF-36: Significant improvements in physical functioning (at 1 and 6 months) and mental health (at 6 months) in IG;<br>AQoL: no sign. difference at 1 or 6 months. |

|                            |      |             |     |                                                          |                                                                    |                                      |                                                                                                                                                                                                                                                                                                                                                                                                                                                                                                                                                                                                                                                                                                                                                                                                                                                                                                                           |                                                                                                          |                                                                                                                                                                                                                                                                                           |                                                                                                                                                                                                                                                                                                                                                                                                                                                                                                                                                                                                                                                                                                                                                                                                                                                                     |
|----------------------------|------|-------------|-----|----------------------------------------------------------|--------------------------------------------------------------------|--------------------------------------|---------------------------------------------------------------------------------------------------------------------------------------------------------------------------------------------------------------------------------------------------------------------------------------------------------------------------------------------------------------------------------------------------------------------------------------------------------------------------------------------------------------------------------------------------------------------------------------------------------------------------------------------------------------------------------------------------------------------------------------------------------------------------------------------------------------------------------------------------------------------------------------------------------------------------|----------------------------------------------------------------------------------------------------------|-------------------------------------------------------------------------------------------------------------------------------------------------------------------------------------------------------------------------------------------------------------------------------------------|---------------------------------------------------------------------------------------------------------------------------------------------------------------------------------------------------------------------------------------------------------------------------------------------------------------------------------------------------------------------------------------------------------------------------------------------------------------------------------------------------------------------------------------------------------------------------------------------------------------------------------------------------------------------------------------------------------------------------------------------------------------------------------------------------------------------------------------------------------------------|
| Bloodworth LS <sup>3</sup> | 2019 | USA         | 96  | 180 days                                                 | Inpatients: hospital                                               | Patient home, Telephone appointments | <p>Post discharge telephone intervention on days 2, 9, 25:</p> <ol style="list-style-type: none"> <li>1) comprehensive medication review, assessing health status, identifying and solving potential or existing drug related problems (DRP) on indication, effectiveness, safety and adherence;</li> <li>2) answering patient questions;</li> <li>3) assessing and reinforcing adherence;</li> <li>4) providing information on discharge instructions;</li> <li>5) addressing disease specific standard of care protocols;</li> <li>6) ensuring patient has a primary care provider.</li> </ol> <p>Face-to-face intervention on days 4-7 and 90 and final telephone intervention on day 180:</p> <ol style="list-style-type: none"> <li>1) development of an action plan for adherence to medication and lifestyle changes;</li> <li>2) providing disease-specific health education;</li> <li>3) solving DRP.</li> </ol> | Community pharmacist; face-to-face visits also performed by pharmacist coordinator or pharmacy residents | <p>P: 30-day-readmission rate (index diagnosis); 30-day-readmission rate (all-cause).</p> <p>S: Mean time to readmission for index diagnosis; Mean time to readmission for index diagnosis; Number of MTM encounters (IG); Number of DRP (IG); Number of clinical interventions (IG).</p> | <p>P: No sign. difference in 30-day-readmission rate (index diagnosis) (IG 5.8% vs. CG 6.9%; p=0.761); No sign. difference in 30-day-readmission rate (all-cause) (IG 10.5% vs. CG 16.2%; p=0.242).</p> <p>S: No sign. difference in mean time to readmission (index diagnosis) (IG 82.8 days (43.5-122.0) vs. CG 68.5 days (46.1-90.9); p=0.539); Sign difference in mean time to readmission (all cause): (IG 94.4 days (76.9-112.0) vs. CG 68.1 days (54.981.3); p= 0.002).</p> <p>Number of MTM encounters: 59.4% of enrolled patients completed at least 1 MTM encounter, of those 20.8% 2 encounters, 16.7% 3 encounters; Number of DRP: 98.1% of patients had at least one DRP, 20% &gt; 5 DRP, e.g. 54.4% required additional drug therapy; Number of clinical interventions:453 interventions, chronic disease education in 31.1% as most common type.</p> |
| Bouvy ML <sup>4</sup>      | 2003 | Netherlands | 152 | 6 months                                                 | Inpatients: hospital; outpatients: specialist outpatient HF clinic | Community pharmacy                   | <ol style="list-style-type: none"> <li>1) Structured patient interview at first pharmacy visit after inclusion;</li> <li>2) Discussion of drug and reasons for non-adherence use based on computerized medication history;</li> <li>3) Reinforcing medication adherence.</li> </ol> <p>Monthly patient contact.</p>                                                                                                                                                                                                                                                                                                                                                                                                                                                                                                                                                                                                       | Community pharmacists                                                                                    | <p>P: Number of days without loop diuretic; Periods with <math>\geq 2</math> days of consecutive non-dosing (MEMS).</p> <p>S: Number of all-cause readmission; Number of deaths; QoL: Changes in scores of MLHFQ, COOP-WONCA.</p>                                                         | <p>P: Sign. difference in number of days without loop diuretics (IG 140/7656 days vs. CG 337/6196 days; RR 0.33, 95% CI, 0.24-0.38); Sign. difference in periods with <math>\geq 2</math> days of consecutive non-dosing (IG 18/7656 days vs. CG 46/6196 days; RR 0.82, 95% CI 0.19-0.55).</p> <p>S: No sign. differences in number of all-cause readmission, number of deaths or QoL.</p>                                                                                                                                                                                                                                                                                                                                                                                                                                                                          |
| Bucci C <sup>5</sup>       | 2003 | Canada      | 80  | IG: mean 42.4 (30-90) days<br>CG: mean 44.7 (30-83) days | Outpatient clinic                                                  | Outpatient clinic                    | "Patients randomized to the IG received the outlined pharmacist services, that is, functioning as part of the healthcare team, meeting the patients' drug-related needs and insuring continuity of care"                                                                                                                                                                                                                                                                                                                                                                                                                                                                                                                                                                                                                                                                                                                  | Pharmacist as team member in the heart function clinic                                                   | <p>P: Mean changes in MAI-scores.</p> <p>S: Mean changes in directive guidance scale (DG).</p>                                                                                                                                                                                            | <p>P: No sign. difference in mean changes in MAI-scores (IG 0.74 <math>\pm</math> 2.42 vs. CG 0.49 <math>\pm</math> 1.82; p=0.605).</p> <p>S: Sign. difference in mean changes in total DG score (IG 9.97 vs. CG 1.00; p&lt;0.001).</p>                                                                                                                                                                                                                                                                                                                                                                                                                                                                                                                                                                                                                             |

|                           |      |        |     |          |                                                                                                  |                                          |                                                                                                                                                                                                                                                                                                                                                                                                                                                                                                                                                                                                                                                           |                     |                                                                                                                                                                                                                |                                                                                                                                                                                                                                                                                                                                                                                                                                                                                                                                                                                                                                                                             |
|---------------------------|------|--------|-----|----------|--------------------------------------------------------------------------------------------------|------------------------------------------|-----------------------------------------------------------------------------------------------------------------------------------------------------------------------------------------------------------------------------------------------------------------------------------------------------------------------------------------------------------------------------------------------------------------------------------------------------------------------------------------------------------------------------------------------------------------------------------------------------------------------------------------------------------|---------------------|----------------------------------------------------------------------------------------------------------------------------------------------------------------------------------------------------------------|-----------------------------------------------------------------------------------------------------------------------------------------------------------------------------------------------------------------------------------------------------------------------------------------------------------------------------------------------------------------------------------------------------------------------------------------------------------------------------------------------------------------------------------------------------------------------------------------------------------------------------------------------------------------------------|
| Chambela MDC <sup>6</sup> | 2019 | Brazil | 81  | 1 year   | Outpatients: clinic office, appointment with the clinical pharmacist after doctor's appointment. | Pharmacist office in clinic              | <ol style="list-style-type: none"> <li>1) Dispensing of drugs;</li> <li>2) Pharmacist consultation;</li> <li>3) Organization of drugs into a scheme based on coloured labels to support understanding of the prescription;</li> <li>4) Explanation of the drug scheme and reinforcing patients to understand the instructions for intake;</li> <li>5) Reinforcement of adherence to the treatment (explanation of each drug, dosage and importance of correctly following the prescription), to recognize and solve problems;</li> <li>6) Improving patients knowledge and understanding of HF;</li> <li>7) Solving DRP with the cardiologist.</li> </ol> | Clinical pharmacist | <p>P: QoL: Changes in scores of</p> <ul style="list-style-type: none"> <li>- SF-36</li> <li>- MLHFQ.</li> </ul> <p>S: Changes in mean number of DRP; Mean changes in medication adherence (Morisky scale).</p> | <p>P: SF-36: sign. difference in scores at 12 months (IG vs. CG) for</p> <ul style="list-style-type: none"> <li>- physical functioning 16.6 vs. -8.5 (p&lt;0.001)</li> <li>- role-physical 34.0 vs. 5.2 (p=0.01)</li> <li>- general health 19.4 vs. -6.1 (p&lt;0.001)</li> <li>- vitality 11.5 vs. -5.8 (p=0.003)</li> <li>-social functioning 7.5 vs. -13.3 (p=0.002)</li> <li>- mental health 9.0 vs. -3.7 (p=0.006);</li> </ul> <p>MLHFQ: sign. difference in scores (IG -12.7 vs. CG 4.8; p&lt;0.001).</p> <p>S: Sign. decrease of DRP at 6 months (IG -0.6 vs. CG 0.0; p=0.005); Sign. increase of medication adherence at 3 months (IG -0.7 vs. CG 0.1; p=0.001).</p> |
| Gattis WA <sup>7</sup>    | 1999 | USA    | 181 | 6 months | Outpatients                                                                                      | Outpatient clinic, Telephone appointment | <ol style="list-style-type: none"> <li>1) Discussing patient's case with the attending physician;</li> <li>2) Providing therapeutic recommendations for therapy optimization: focus on HF medication (ACEi use and target doses, DRP etc.);</li> <li>3) Discussing changes in drug therapy with the patient and explanation of prescribed drugs;</li> <li>4) Reinforcing medication adherence;</li> <li>5) Provision of a medication plan.</li> </ol> <p>Follow-up via telephone (at 2, 14, 24 weeks) to identify DRP and clinical events, to discuss with physician, if necessary.</p>                                                                   | Clinical pharmacist | <p>P: Composite number of all-cause mortality and HF readmissions.</p> <p>S: Median of prescribed ACEi doses.</p>                                                                                              | <p>P: Sign. difference in composite all-cause mortality and HF readmissions (IG 4 vs. CG 16, OR 0.22, 95% CI 0.07-0.65; p=0.005).</p> <p>S: Sign. difference in median (Q25/Q75) ACEi doses at 6 months (IG 1.0 (0.5/1) vs. CG 0.5 (0.188/1); p&lt;0.001); No sign. difference in overall ACEi prescription between IG and CG.</p>                                                                                                                                                                                                                                                                                                                                          |

|                         |      |     |     |          |                                          |                    |                                                                                                                                                                                                                                                                                                                                                                                                                                                                                                                                                                                                                   |                       |                                                                                                                                                                                                                                                                                                                                                                      |                                                                                                                                                                                                                                                                                                                                                                                                                                                                                                                                                                                                                                                                                                                                                                      |
|-------------------------|------|-----|-----|----------|------------------------------------------|--------------------|-------------------------------------------------------------------------------------------------------------------------------------------------------------------------------------------------------------------------------------------------------------------------------------------------------------------------------------------------------------------------------------------------------------------------------------------------------------------------------------------------------------------------------------------------------------------------------------------------------------------|-----------------------|----------------------------------------------------------------------------------------------------------------------------------------------------------------------------------------------------------------------------------------------------------------------------------------------------------------------------------------------------------------------|----------------------------------------------------------------------------------------------------------------------------------------------------------------------------------------------------------------------------------------------------------------------------------------------------------------------------------------------------------------------------------------------------------------------------------------------------------------------------------------------------------------------------------------------------------------------------------------------------------------------------------------------------------------------------------------------------------------------------------------------------------------------|
| Goodyer LI <sup>8</sup> | 1995 | UK  | 100 | 3 months | Outpatient clinics                       | Patient home       | <p>1) Standardized medication counselling on prescribed drugs (verbally and written information leaflets);</p> <p>2) Providing medication plan.</p> <p>Three home visits, in a 2-4 weeks' interval.</p>                                                                                                                                                                                                                                                                                                                                                                                                           | Pharmacist            | <p>Changes between and within IG and CG in</p> <ul style="list-style-type: none"> <li>- Medication adherence (tablet count per intended number of tablets)</li> <li>- Knowledge of drugs</li> <li>- 6-minutes walk test</li> <li>- Bodyweight/oedema</li> <li>- Subjective symptom scores (Nottingham Health Profile (NHP), Visual Analogue Scale (VAS)).</li> </ul> | <p>Sign. difference in medication adherence (IG 93% ± 11.7 vs. CG 51% ± 31.5; p&lt;0.001);</p> <p>Sign. improvement in knowledge of drugs on awareness of name, purpose, dose and adverse effects (IG vs. CG;p&lt;0.001);</p> <p>Sign. difference in 6-minutes-walk test (IG 159 m (190-128) vs CG 123 m (142-100); p&lt;0.001);</p> <p>No sign. difference in bodyweight (IG vs. CG);</p> <p>Sign. difference for percentage patients with no peripheral oedema (IG 81 % vs. CG 49%; p&lt;0.05);</p> <p>NHP: no sign. difference between scores (IG vs. CG);</p> <p>VAS: significant difference in median (Q25/Q75) scores (IG vs. CG).</p>                                                                                                                         |
| Heaton PC <sup>9</sup>  | 2019 | USA | 113 | 30 days  | Patients at hospital discharge: Hospital | Community pharmacy | <p>1) Medication reconciliation/ medication review;</p> <p>2) patient counselling incl. education on new medication or diagnoses;</p> <p>3) Self-management education, setting health-related goals;</p> <p>4) Education on symptoms for disease deterioration and according actions;</p> <p>5) Primary adherence: ensuring fill of first prescription; secondary adherence: provision of medication in pill boxes;</p> <p>6) Providing folder with necessary information on medication (incl. medication plan) and appointments)</p> <p>7) Providing logs for self-monitoring (weight, blood pressure etc.).</p> | Community pharmacists | <p>P: 30-day readmission rate.</p> <p>S: Medication adherence (primary non-adherence for 30 days after discharge (picked up prescriptions per filled prescriptions);</p> <p>Secondary adherence for 180 days after discharge (PDC &gt;80%));</p> <p>Patient satisfaction;</p> <p>Mean number and types of pharmacist IV.</p>                                         | <p>P: No sign. difference in 30-day readmission rate for ITT (IG 11.3% vs. CG 10.7%; p=0.49);</p> <p>Sign. difference in 30-day readmission rate for PP (IG 1.6% vs. CG 10.7%; p=0.02.</p> <p>S: No sign. difference in primary non-adherence ITT (IG 8.3% ± 20.8 vs. CG 8.9 ± 21.8; p=0.87);</p> <p>No sign. difference in primary non-adherence PP (IG 6.4% ± 18.6 vs. CG 8.9 ± 21.8; p=0.59);</p> <p>Sign. difference in secondary adherence ITT (IG 60.5% vs. CG 37.5%; p=0.04);</p> <p>No sign. difference in secondary adherence PP (IG 60.5% vs. CG 37.5%; p=0.09);</p> <p>No sign. difference in patient satisfaction (IG vs. CG);</p> <p>Mean number of pharmacist IV per patient IG: 6.2 (0-21); mostly self-care and self-monitoring recommendations.</p> |

|                          |      |        |     |                    |                                                   |                                      |                                                                                                                                                                                                                                                                                                                                                                                        |                                  |                                                                                                                                                                                                                                                                                                                                                   |                                                                                                                                                                                                                                                                                                                                                                                                                                                                                                                                                                                                                                                                                   |
|--------------------------|------|--------|-----|--------------------|---------------------------------------------------|--------------------------------------|----------------------------------------------------------------------------------------------------------------------------------------------------------------------------------------------------------------------------------------------------------------------------------------------------------------------------------------------------------------------------------------|----------------------------------|---------------------------------------------------------------------------------------------------------------------------------------------------------------------------------------------------------------------------------------------------------------------------------------------------------------------------------------------------|-----------------------------------------------------------------------------------------------------------------------------------------------------------------------------------------------------------------------------------------------------------------------------------------------------------------------------------------------------------------------------------------------------------------------------------------------------------------------------------------------------------------------------------------------------------------------------------------------------------------------------------------------------------------------------------|
| Hogg W <sup>10</sup>     | 2009 | Canada | 41  | 14.9 months (Mean) | Outpatients: family health network (primary care) | Patient home, Telephone appointments | 1) Medication review (incl. identifying DRP and addressing potential DRP in multidisciplinary team (pharmacist IV).                                                                                                                                                                                                                                                                    | Pharmacist, NP, family physician | P: Changes in Quality of care for chronic disease management (CDM-score).<br>S: Changes in blood pressure;<br>Adherence to preventive care recommendations;<br>Changes in QoL (SF-36, health related QoL);<br>Changes in hospitalizations and emergency use.                                                                                      | P: Sign. improvement of CDM-score in IG (IG vs. CG absolute difference 9.1%; 95% CI 3.7-14.4%; p=0.013).<br>S: No sign. difference in blood pressure;<br>Sign. difference in overall adherence for preventive care recommendations (IG vs. CG absolute difference 18.1%, 95% CI 10.8-25.5%; p<0.001);<br>No sign. difference in QoL-scores;<br>No sign. differences in hospitalizations or emergency use.                                                                                                                                                                                                                                                                         |
| Holland R <sup>11</sup>  | 2007 | UK     | 293 | 6 months           | Patients at hospital discharge: Hospital          | Patient home                         | 1) Medication review;<br>2) Providing advice on<br>- symptom self-management<br>- lifestyle advice.<br><br>1-2 visits within 2 and 8 weeks after discharge.                                                                                                                                                                                                                            | Community pharmacists            | P: Number of all-cause emergency readmissions.<br>S: Number of deaths;<br>Changes in QoL (mean difference MLHFQ, EQ-5D);<br>Changes in medication adherence (MARS-score).                                                                                                                                                                         | P: No sign. difference in all-cause readmissions (IG 134 admissions vs. CG 112, rate ratio 1.15, 95% CI 0.89-1.48; p=0.28).<br>S: No sign. difference in number of deaths (IG 30 vs. CG 24, HR 1.18, 95% CI 0.69-2.03; p=0.54);<br>No sign. difference in QoL-scores (adjusted mean difference IG vs. CG, MLHFQ:3.73, 95% CI -3.67-11.13; p=0.32; EQ-5D: 0.07, 95% CI -0.01-0.14; p=0.008);<br>No sign. difference in adherence (adjusted mean difference IG vs. CG 0.12, 95% CI -0.48-0.73; p=0.68).                                                                                                                                                                             |
| Korajkic A <sup>12</sup> | 2011 | AUS    | 70  | 3 months           | Outpatient clinic                                 | Outpatient clinic                    | 1) Patient education focusing on<br>- self-adjusting diuretic dosing (furosemide)<br>- improving self-care<br>- recognizing symptoms of fluid retention<br>- daily weight measure<br>- improving knowledge on HF and HF drugs;<br>2) Provision of weight/dosing logs.<br><br>30 min educational session during clinic appointment, followed by monitoring calls at 4, 8 and 12 months. | Pharmacist                       | P: Mean number of appropriate weight-titrated furosemide dose adjustments per patient.<br>S: Number of patients who appropriately self-adjusted the loop diuretic dose;<br>Number of appropriate dose-adjustments;<br>Number of HF readmissions;<br>Changes in QoL-scores (MLHFQ);<br>Number of patients with improved knowledge of HF and drugs. | P: Sign. improvement in mean number of appropriate weight-titrated furosemide dose adjustments (IG vs. CG, 2 <sup>nd</sup> month p=0.02, 3 <sup>rd</sup> month p=0.005).<br>S: Sign. difference in number of patients who appropriately self-adjusted the loop diuretic dose after 3 months (IG 28 vs. CG 18; p=0.01);<br>Sign. difference in number of appropriate adjustments (IG vs. CG, 2 <sup>nd</sup> month p=0.01, 3 <sup>rd</sup> month p=0.004);<br>Sign. difference in number of HF readmission (IG 14% vs. CG 31%; p=0.04);<br>Sign. difference in total MLHFQ-score (IG 48 ± 19, CG 38 ± 21; p=0.03);<br>Sign. difference in HF knowledge(IG 94% vs. CG 71%; p=0.01). |

|                               |      |        |      |           |                                             |                                                               |                                                                                                                                                                                                                                                                                                                                                                      |                               |                                                                                                                                                                                                                                                                                    |                                                                                                                                                                                                                                                                                                                                                                                                                                                                                                                                                                                                                                                                                                                                                                                                   |
|-------------------------------|------|--------|------|-----------|---------------------------------------------|---------------------------------------------------------------|----------------------------------------------------------------------------------------------------------------------------------------------------------------------------------------------------------------------------------------------------------------------------------------------------------------------------------------------------------------------|-------------------------------|------------------------------------------------------------------------------------------------------------------------------------------------------------------------------------------------------------------------------------------------------------------------------------|---------------------------------------------------------------------------------------------------------------------------------------------------------------------------------------------------------------------------------------------------------------------------------------------------------------------------------------------------------------------------------------------------------------------------------------------------------------------------------------------------------------------------------------------------------------------------------------------------------------------------------------------------------------------------------------------------------------------------------------------------------------------------------------------------|
| Lee KK <sup>13</sup>          | 2020 | USA    | 2091 | 30 days   | Patients at hospital discharge: Hospital    | Telephone appointment                                         | 1) Giving directions on diuretic-titration and on other HF drugs;<br>2) Assessing reported HF symptoms, weight and vital signs to order laboratory tests;<br>3) Arranging necessary follow-up appointments with physicians;<br>4) Scheduling further telephone appointments, if clinically necessary.                                                                | Study pharmacist, study nurse | P: 30-day-readmission for HF after discharge.<br>S: 30-day-readmission for any cause, 30-day all-cause death; Successful completion of early follow-up; Utilization of telephone appointment or 7-day clinic appointment.                                                          | P: No sign. difference of 30-day-readmission for HF (IG: 8.6% vs. CG 10.6%; p=0.11).<br>S: No sign difference of 30-day-readmission for any cause (IG: 18.8% vs. CG: 20.6%; p=0.30);<br>No sign. difference of 30-day all-cause death (IG: 4.0% vs. CG: 4.6%; p=0.49);<br>Sign. difference in completed early follow-up (IG: 92% vs. CG: 79%;p<0.001);<br>Sign. difference in frequency of clinical visits during 7 days after discharge (IG 48% vs.CG: 77%; p<0.001).                                                                                                                                                                                                                                                                                                                            |
| Linné AB <sup>14</sup>        | 1999 | Sweden | 130  | 6 months  | Outpatients 1 week after hospital discharge | Study site hospital                                           | 1) Patient education on<br>- HF medication, effects and side effects<br>- information on (side) effects of prescribed HF medication;<br>2) Interactive CD-portfolio program (with portable photo CD-player + mini-TV) on<br>- symptoms, signs and causes of impairment<br>- action and side-effects of HF medication.<br><br>3 weeks post discharge (pharmacist IV). | Study pharmacist, study nurse | P: Mean difference in scores of a questionnaire on general knowledge and treatment of HF.<br>S: Number and type of visits to the healthcare system;<br>Changes in medication.                                                                                                      | P: Sign. difference in knowledge scores (IG 17.2 points (95% CI 15.9-18.5) vs. CG 14.3 points (95% CI 13.0-15.6); p=0.0051).<br>S: reported "elsewhere" (PMID: 10938491).                                                                                                                                                                                                                                                                                                                                                                                                                                                                                                                                                                                                                         |
| López Cabezas C <sup>15</sup> | 2006 | Spain  | 134  | 12 months | Patients at hospital discharge: Hospital    | Inpatient ward of study site hospital, Telephone appointments | 1) Patient education on the disease, drug therapy and diet.<br><br>Regular telephone appointments: monthly during the first 6 months, then bi-monthly for reinforcement (e.g. education).                                                                                                                                                                            | Hospital pharmacist           | P: Time to first all-cause readmission;<br>Percentage of patients with all-cause readmissions;<br>Number of readmissions per patient;<br>Number of hospital stay days per patient.<br>S: Medication adherence; QoL (EuroQoL); patient satisfaction with care;<br>Number of deaths. | P: Time to first readmission: n.a.;<br>Sign. difference in percentage of patients with all-cause readmissions at 6 months (IG 42.2% vs. CG 24.3%; p=0.028, n.s. at 12 months);<br>Sign. difference in number of readmissions per patient at 6 months (IG 0.36 ± 0.72 vs. CG 0.84 ± 1.45; p=0.023; n.s. at 12 months);<br>Sign. difference in number of hospital stay days per patient at 6 months (IG 4.3 ± 13.1 vs. 6.8 ± 12.5;p=0.020; n.s. at 12 months).<br>S: No difference in medication adherence at 12 months (IG 85.0% vs. CG 73.9%;p=n.a.);<br>No sign. difference in QoL at 2, 6 and 12 months (n.s.);<br>Sign. difference at satisfaction with care at 2 months, (p=0.026; n.s. at 6 and 12 months);<br>Sign. difference in deaths at 12 months (IG 12.9% vs. CG 29.7% (IG); p<0.05). |

|                          |      |     |      |                    |                                                                                                 |                                                |                                                                                                                                                                                                                                                                                                                                                                            |                                                       |                                                                                                                                                                                                                                                       |                                                                                                                                                                                                                                                                                                                                                                                                                                                                                                                                                                                                                                                                                                                                                                                         |
|--------------------------|------|-----|------|--------------------|-------------------------------------------------------------------------------------------------|------------------------------------------------|----------------------------------------------------------------------------------------------------------------------------------------------------------------------------------------------------------------------------------------------------------------------------------------------------------------------------------------------------------------------------|-------------------------------------------------------|-------------------------------------------------------------------------------------------------------------------------------------------------------------------------------------------------------------------------------------------------------|-----------------------------------------------------------------------------------------------------------------------------------------------------------------------------------------------------------------------------------------------------------------------------------------------------------------------------------------------------------------------------------------------------------------------------------------------------------------------------------------------------------------------------------------------------------------------------------------------------------------------------------------------------------------------------------------------------------------------------------------------------------------------------------------|
| Lowrie R <sup>16</sup>   | 2012 | UK  | 2164 | 4.7 years (median) | Outpatients: primary-care family doctor practices                                               | Primary care practices                         | 1) Medication review to optimize medical treatment according to guidelines.                                                                                                                                                                                                                                                                                                | Primary care pharmacists, family doctors              | P: Composite all-cause death or HF readmission.<br>S: Composite of all-cause death or CV readmission; All-cause death; all-cause readmissions; Total number of readmissions.                                                                          | P: No sign. difference in composite all-cause death or HF readmission (IG 36% vs. CG 35%, adjusted HR 0.97; 95%CI, 0.83-1.14; p=0.72).<br>S: No sign. difference in composite of all-cause death or CV readmission (IG 45% vs. CG 44%, adjusted HR 0.97; 95%CI, 0.84-1.12; p=0.70);<br>No sign. difference in all-cause death (IG 31% vs. CG 31%, adjusted HR 0.96; 95%CI, 0.80-1.16; p=0.68);<br>No sign. difference in all-cause readmission (IG 65% vs. CG 65%, adjusted HR 0.97; 95%CI, 0.87-1.09; p=0.61);<br>No sign. difference in total number of readmissions (IG 2205 vs. CG 2191; p=0.84).                                                                                                                                                                                   |
| McCarren M <sup>17</sup> | 2013 | USA | 220  | 12 months          | Outpatients: identified via Veterans electronic administrative databases                        | Community pharmacy                             | 1) Information to pharmacist on VHA facility guidelines on beta-blocker prescribing (Level 1, IG and CG);<br>2) Provision of a list with patients not meeting guideline goals (Level 2; IG).                                                                                                                                                                               | Community pharmacists supported by study coordinators | Change in prescription concordance at 6 months;<br>Number of patients reaching target dose.                                                                                                                                                           | Sign. difference in full concordance with guideline goals (IG 5% vs. CG 4%, OR 1.9, 95%CI 1.1-3.2; p=0.024);<br>No sign. difference in number of patients reaching <50%, 50%, >50% of target dose (IG 43, 44, 13% vs CG 69, 25, 6%; OR 1.6, 95%CI 0.8-3.2).                                                                                                                                                                                                                                                                                                                                                                                                                                                                                                                             |
| Murray MD <sup>18</sup>  | 2007 | USA | 314  | 12 months          | Inpatients: at hospital discharge; Outpatients: general medicine practices; cardiology practice | Study pharmacy close to ambulatory care centre | 1) Dispensing specially labeled medication;<br>2) Assessing patients' knowledge;<br>3) Providing instructions about medication use;<br>4) Providing patient-centred verbal instructions and written materials about the medication to support the use of prescribed drugs;<br>5) Monitoring of medication use, health care encounters, bodyweight etc. via study database. | Pharmacist in study pharmacy                          | P: Medication adherence (MEMS); Refill adherence (MPR); Combined HF/CV/all-cause readmissions and emergency visits.<br>S: QoL (Chronic HF Questionnaire); Satisfaction with pharmacy service (internal validated questionnaire); Annual direct costs. | P: Sign. difference in medication adherence (IG 78.8% vs. CG 67.9%, difference, 10.9 percentage points; 95% CI, 5.0-16.7);<br>Sign. difference in refill adherence (IG 109.4% vs. CG 105.2%, difference 4.2 percentage points; p=0.007);<br>Sign. difference in combined all-cause readmissions and emergency visits (IG vs. CG 19.4% less in IG, IRR, 0.82, 95% CI, 0.70-0.93);<br>No sign. difference for combined readmissions and emergency visits for HF/CV (IG vs. CG, n.s.).<br>S: No sign. difference in disease-specific QoL (IG vs. GC; at 6 months: p=0.52; at 12 months: p=0.21);<br>Sign. difference in patient satisfaction (IG 1.0 vs. 0.7; p=0.022);<br>Sign. No sign. difference in annual direct costs (IG vs. CG, difference US\$-2960, 95% CI, US\$-7603-US\$1338). |

|                        |      |                      |     |                  |                                                                                                |                                     |                                                                                                                                                                                                                                                                                                                                                                                                                                                                                                                                                                                                                                   |                                                |                                                                                                                                                                                                                            |                                                                                                                                                                                                                                                                                                                                                                                                                                                                                                                                                                                                                                                                                                                       |
|------------------------|------|----------------------|-----|------------------|------------------------------------------------------------------------------------------------|-------------------------------------|-----------------------------------------------------------------------------------------------------------------------------------------------------------------------------------------------------------------------------------------------------------------------------------------------------------------------------------------------------------------------------------------------------------------------------------------------------------------------------------------------------------------------------------------------------------------------------------------------------------------------------------|------------------------------------------------|----------------------------------------------------------------------------------------------------------------------------------------------------------------------------------------------------------------------------|-----------------------------------------------------------------------------------------------------------------------------------------------------------------------------------------------------------------------------------------------------------------------------------------------------------------------------------------------------------------------------------------------------------------------------------------------------------------------------------------------------------------------------------------------------------------------------------------------------------------------------------------------------------------------------------------------------------------------|
| Sadik A <sup>19</sup>  | 2005 | United Arab Emirates | 221 | 12 months        | Inpatients: general medical ward<br>Outpatients: cardiology and medical outpatient clinics     | Inpatient ward or outpatient clinic | 1) Discussing drug therapy with the physician if rationalization or simplification of dosage regimens were deemed appropriate (Medication review);<br>2) Providing patient education - on HF, prescribed medication and management of HF symptoms (verbal)<br>- Booklet (information on HF, HF symptoms, treatment aims, adherence, side effects, diet and lifestyle changes<br>- on self-monitoring (signs and symptoms, adherence), using monitoring diary card (daily weight), instructions on titrating diuretics if weight increases and to contact the physician immediately<br>- instructions on daily exercise (walking). | Research pharmacists                           | 2-min walk distance (AUC);<br>blood pressure/pulse;<br>bodyweight;<br>FVC (AUC);<br>QoL (MLHFQ, SF-36; both AUC);<br>Medication knowledge;<br>Self-reported adherence.                                                     | Sign. difference in 2-min walk distance (IG 1607.2, 95% CI 1474.9-1739.5 m.month vs. CG 1403.3, 95% CI 1256.5-1549.8; p=0.043);<br>Sign. difference in blood pressure/pulse (IG vs. CG; p<0.05);<br>Bodyweight: n.a.;<br>Sign. difference in FVC (IG 31.6, 95% CI, 30.8-32.4 l.month vs. CG 27.8, 95% CI, 26.8-28.9; p<0.05);<br>Sign. difference in MLHFQ-scores (IG 463.5, 95% CI, 433.2-493.9 unit.month vs. CG 637.5, 95% CI, 597.2-677.7; p<0.05);<br>Sign. difference in SF-36 for all domains (IG vs. CG; p<0.05) except general health and physical functioning;<br>Sign. difference in medication knowledge (IG vs. CG; p<0.05);<br>Sign. difference in self-reported adherence (IG 85 vs. CG 35; p < 0.05). |
| Schulz M <sup>20</sup> | 2019 | Germany              | 237 | 2 years (median) | Outpatients: GP office; internal medicine specialists; office and hospital-based cardiologists | Community pharmacy                  | 1) Medication review to generate a consolidated medication plan with the patient's physician;<br>2) Providing medication in weekly dosing aids;<br>3) Update of medication plan;<br>4) Patient counselling on HF medication;<br>5) Measurement of blood pressure and pulse rate;<br>6) Continuous management of new DRP.<br><br>(Bi-)weekly visits to pharmacy.                                                                                                                                                                                                                                                                   | Community pharmacists and recruiting physician | Efficacy:<br>P: Difference in adherence (PDC) during 365 days.<br>S: Proportion of adherent patients (PDC ≥ 80%);<br>QoL (MLHFQ).<br><br>Safety:<br>P: Days lost due to unplanned cardiovascular hospitalization or death. | Efficacy:<br>P: Sign. difference in adherence (IG vs. CG, difference +5.7%, 95 CI 1.6-9.8; p=0.007).<br>S: Significant difference in proportion of adherent patients (IG vs. CG, Δ18%, OR 2.9, 95% CI 1.4-5.9; p=0.005);<br>No sign. difference in QoL at one year (IG vs. CG, n.s.);<br>Significant difference in QoL at two years (IG vs. CG, -7.8 percentage points, 95% CI -14.5 to -1.1; p=0.02).<br><br>Safety: No sign. difference in all outcomes (IG vs. CG, n.s.).                                                                                                                                                                                                                                          |



|                          |      |     |     |          |                                             |              |                                                                                                                                                                                                                                                                                                                                                                                                                                                                                                                                           |                               |                                                                                                                                                                                                                                                                                |                                                                                                                                                                                                                                                                                                                                                                                                                                                                                                                                                                                   |
|--------------------------|------|-----|-----|----------|---------------------------------------------|--------------|-------------------------------------------------------------------------------------------------------------------------------------------------------------------------------------------------------------------------------------------------------------------------------------------------------------------------------------------------------------------------------------------------------------------------------------------------------------------------------------------------------------------------------------------|-------------------------------|--------------------------------------------------------------------------------------------------------------------------------------------------------------------------------------------------------------------------------------------------------------------------------|-----------------------------------------------------------------------------------------------------------------------------------------------------------------------------------------------------------------------------------------------------------------------------------------------------------------------------------------------------------------------------------------------------------------------------------------------------------------------------------------------------------------------------------------------------------------------------------|
| Stewart S <sup>21</sup>  | 1998 | AUS | 97  | 6 months | Patients at hospital discharge:<br>Hospital | Patient home | 1) Providing medical counselling;<br>2) Initiating a daily reminder routine;<br>3) Providing weekly dosing aids;<br>4) Providing medication information and reminder card;<br>5) Referral to a community pharmacist.                                                                                                                                                                                                                                                                                                                      | Study pharmacist, study nurse | P: Mean frequency of composite unplanned readmissions and out-of-hospital deaths.<br>S: Time to first primary endpoint;<br>Rate of unplanned readmissions;<br>Total days of hospitalization;<br>All-cause deaths;<br>Emergency visits;<br>Costs of hospital-based health care. | P: Sign. difference in mean frequency of composite unplanned readmission and out-of-hospital deaths (IG 0.8 ± 0.9 vs. CG 1.4 ± 1.8; p=0.03).<br>S: No sign. difference in time to first primary event (IG vs. CG, n.s.);<br>Sign. difference in rate of unplanned readmissions (IG 36 vs. CG 63; p= 0.03);<br>Sign. difference in days of hospitalization (IG 261 vs. CG 452; p=0.05);<br>No sign. difference in all-cause deaths (IG 6 vs. CG 12; p=0.11);<br>Sign. difference in emergency visits (IG 48 vs. CG 87; p=0.05);<br>No sign. difference in costs (IG vs. CG, n.s.). |
| Triller DM <sup>22</sup> | 2007 | USA | 154 | 6 months | Patients at hospital discharge:<br>Hospital | Patient home | At initial assessment:<br>1) Medication review with patient interview on use (identifying DRP and inappropriate use);<br>2) Counselling patients on lifestyle changes (diet, smoking)<br>3) Promoting medication adherence.<br><br>2 follow-up visits (7-10; 18-21 days after initial assessment)<br><br>During intervention period (first 3 weeks):<br>4) Review of physician notes and laboratory test values via database;<br>5) Interaction with prescriber if necessary (recommendations based on interview and monitoring of data). | Study pharmacist              | All-cause hospitalization;<br>HF-related hospitalization;<br>All-cause deaths;<br>Time to primary outcome event;<br>Total events (composite all-cause hospitalization and deaths);<br>Total hospital days;<br>QoL.                                                             | No sign. difference in all-cause hospitalizations (IG vs. CG, Relative Risk (RR) 0.93; p=0.63);<br>No sign. difference in HF related hospitalization IG vs. CG, RR 0.82; p=0.26);<br>No sign. difference in all-cause deaths (IG vs. CG, RR 1.21; p=0.67);<br>Time to primary event: n.a.;<br>No sign. difference in composite endpoint (IG vs. CG, RR 0.98; p=1.0);<br>No sign. difference in hospital days and QoL (IG vs. CG, n.s.).                                                                                                                                           |

|                          |      |        |     |           |                                                        |                                                                              |                                                                                                                                                                                                                                                                                                                                                                                                                                                                                                                                                                                                                                                                                                                                                                |                                                     |                                                                                                                                                                                                                                                                                                                                  |                                                                                                                                                                                                                                                                                                                                                                                                                                                                                                                                                                                                                                                                                                                                                                                                                            |
|--------------------------|------|--------|-----|-----------|--------------------------------------------------------|------------------------------------------------------------------------------|----------------------------------------------------------------------------------------------------------------------------------------------------------------------------------------------------------------------------------------------------------------------------------------------------------------------------------------------------------------------------------------------------------------------------------------------------------------------------------------------------------------------------------------------------------------------------------------------------------------------------------------------------------------------------------------------------------------------------------------------------------------|-----------------------------------------------------|----------------------------------------------------------------------------------------------------------------------------------------------------------------------------------------------------------------------------------------------------------------------------------------------------------------------------------|----------------------------------------------------------------------------------------------------------------------------------------------------------------------------------------------------------------------------------------------------------------------------------------------------------------------------------------------------------------------------------------------------------------------------------------------------------------------------------------------------------------------------------------------------------------------------------------------------------------------------------------------------------------------------------------------------------------------------------------------------------------------------------------------------------------------------|
| Tsuyuki RT <sup>23</sup> | 2004 | Canada | 766 | 6 months  | Patients at hospital discharge: Hospital               | Inpatient ward of study site hospital, Telephone appointments (patient home) | <p>Stage 1: Advise on prescribing ACEi or check of ACEi dosage (all patients IG/CG);</p> <p>Stage 2:</p> <ol style="list-style-type: none"> <li>1) Patient education program (written material);</li> <li>2) Providing of adherence aids (dosing aid, medication plan, daily weight log);</li> <li>3) Providing monthly newsletter "Living with Congestive HF" (IG).</li> </ol> <p>Telephone appointments at 2 weeks, 4 weeks, thereafter weekly for 6 months after discharge for reinforcement (e.g. adherence, education).</p>                                                                                                                                                                                                                               | Research (hospital) pharmacists and research nurses | <p>Stage 1:</p> <p>P: Proportion of patients receiving ACEi at hospital admission compared with that at hospital discharge.</p> <p>S: Dosage of ACEi at hospital admission compared with that at hospital discharge.</p> <p>Stage 2:</p> <p>P: ACEi adherence (MPR for 180 days).</p> <p>S: Clinical events.</p>                 | <p>Stage 1:</p> <p>P: Sign. difference in ACEi at admission: 58% vs. 83% at discharge; p&lt;0.001.</p> <p>S: Sign. difference in average daily ACEi dose at hospital admission/initiation 11.3 ± 8.8 mg/day enalapril equivalents vs. discharge: 14.5 ± 8.8 mg/day; p&lt;0.001.</p> <p>Stage 2:</p> <p>P: No sign. difference in ACEi adherence (IG 83.5 ± 29% vs. CG 86.2 ± 29%; p=0.691).</p> <p>S: No sign. difference in all cause clinical events (IG vs. CG, n.s.);</p> <p>Sign. difference in total length of hospital stay (IG 627 days vs. CG 1082 days; p&lt;0.001);</p> <p>Sign. difference in average length of hospital stay (IG 6.6 ± 5.5 days vs CG 11.0 ± 9.2 days; p&lt;0.001).</p>                                                                                                                       |
| Varma S <sup>24</sup>    | 1999 | UK     | 83  | 12 months | Inpatients: hospital<br>Outpatients: outpatient clinic | Inpatient ward or outpatient clinic of study site hospitals                  | <ol style="list-style-type: none"> <li>1) Discussing drug therapy with the physician if rationalization or simplification of dosage regimens were deemed appropriate (Medication review);</li> <li>2) Providing patient education <ul style="list-style-type: none"> <li>- on HF, prescribed medication and management of HF symptoms (verbal)</li> <li>- Booklet (information on HF, HF symptoms, treatment aims, adherence, side effects, diet and lifestyle changes</li> <li>- on self-monitoring (signs and symptoms, adherence), using monitoring diary card (daily weight), instructions on titrating diuretics if weight increases and to contact the physician immediately</li> <li>- instructions on daily exercise (walking).</li> </ul> </li> </ol> | Research pharmacists                                | <p>2-minute walk test;</p> <p>Blood pressure/pulse;</p> <p>Body weight/BMI;</p> <p>FVC;</p> <p>QoL (MLHFQ, SF-36);</p> <p>Adherence (self-report, Drug use profiles);</p> <p>Knowledge on medication;</p> <p>Number of hospital admissions;</p> <p>Number of emergency room visits/ call-outs.</p> <p>At 3, 6 and 12 months.</p> | <p>Sign. difference in 2-minute walk test at 6 months (IG 90.3 ± 39.2 m vs. CG 64.2 ± 29.4 m; p=0.003);</p> <p>Sign. difference in diastolic blood pressure at 12 months (IG 70.7 ± 10.4 mmHg vs. CG 59.4 ± 8.3; p=0.001);</p> <p>No sign difference in body weight, BMI, FVC (IG vs. CG, n.s.);</p> <p>Sign. difference in scores of MLHFQ at 9 months (IG 15.6 ± 14.6 vs. CG 25.7 ± 18.5; p=0.004);</p> <p>Sign. differences in some domains of SF-36 (IG vs. CG; p&lt;0.05);</p> <p>Sign. difference in adherent patients according to drug use profiles (IG 10 vs. CG 3; p= 0.039);</p> <p>Sign. difference in patient knowledge on HF drugs at 12 months (IG vs. CG; p=0.0026);</p> <p>Sign. difference in hospital admissions (IG 14 vs. CG 27; p=0.006);</p> <p>No sign. difference in ER use (IG vs. CG, n.s.)</p> |

ACEi, angiotensin-converting enzyme inhibitor; AUS, Australia; BMI, body mass index; CG, control group; CI, confidence interval; COOP-WONCA (generic quality of life instrument); CV, cardiovascular; DRP, Drug Related Problem; GDS, Geriatric Depression Scale; GP, general practitioner; FVC, forced vital capacity; HF, heart failure; HR, hazard ratio; IG, intervention group; IRR, incidence rate ratio; ITT, intention-to-treat; IV, intervention; MAI, medication appropriateness index; MD, medical doctor; MLHFQ, Minnesota Living with Heart Failure Questionnaire (HF-specific QoL instrument); MEMS, medication event monitoring system; MPR, medication possession ratio; MTM, medication therapy management; n.a., not available; NP, nurse practitioner; n.s., not significant; OR, odds ratio; QoL, quality of life; PDC, proportion of days covered; PP, per protocol; SF-36, short form 36 (generic quality of life instrument); sign., significant; UK, United Kingdom; USA, United States of America; VHA, veterans health administration.

## Literature Cited

1. Azad N, Molnar F, Byszewski A. Lessons learned from a multidisciplinary heart failure clinic for older women: a randomised controlled trial. *Age Ageing* 2008; **37**:282–287.
2. Barker A, Barlis P, Berlowitz D, Page K, Jackson B, Lim WK. Pharmacist directed home medication reviews in patients with chronic heart failure: a randomised clinical trial. *Int. J. Cardiol.* 2012; **159**:139–143.
3. Bloodworth LS, Malinowski SS, Lirette ST, Ross LA. Pharmacist linkage in care transitions: From academic medical center to community. *J Am Pharm Assoc (2003)* 2019; **59**:896–904.
4. Bouvy ML, Heerdink ER, Urquhart J, Grobbee DE, Hoes AW, Leufkens, Hubert G. M., Hoe AW. Effect of a pharmacist-led intervention on diuretic compliance in heart failure patients: a randomized controlled study. *J Card Fail* 2003; **9**:404–411.
5. Bucci C, Jackevicius C, McFarlane K, Liu P. Pharmacist's contribution in a heart function clinic: Patient perception and medication appropriateness. *Can J Cardiol* 2003; **19**:391–396.
6. Chambela MdC, Mediano MFF, Carneiro FM, Ferreira RR, Waghahi MC, Mendes VG, Oliveira LdS, Holanda MT de, Sousa AS de, da Costa AR, Xavier SS, da Silva GMS, Saraiva RM. Impact of pharmaceutical care on the quality of life of patients with heart failure due to chronic Chagas disease: Randomized clinical trial. *Br J Clin Pharmacol* 2020; **86**:143–154.
7. Gattis WA, Hasselblad V, Whellan DJ, O'Connor CM. Reduction in heart failure events by the addition of a clinical pharmacist to the heart failure management team: results of the Pharmacist in Heart Failure Assessment Recommendation and Monitoring (PHARM) Study. *Arch. Intern. Med.* 1999; **159**:1939–1945.
8. Goodyer LI, Miskelly F, Milligan P. Does encouraging good compliance improve patients' clinical condition in heart failure? *Br J Clin Pract* 1995; **49**:173–176.
9. Heaton PC, Frede S, Kordahi A, Lowery L, Moorhead B, Kirby J, Kunze N, Luder H. Improving care transitions through medication therapy management: A community partnership to reduce readmissions in multiple health-systems. *J Am Pharm Assoc (2003)* 2019; **59**:319–328.
10. Hogg W, Lemelin J, Dahrouge S, Liddy C, Armstrong CD, Legault F, Dalziel B, Zhang W. Randomized controlled trial of anticipatory and preventive multidisciplinary team care: for complex patients in a community-based primary care setting. *Can Fam Physician* 2009; **55**:e76-85.
11. Holland R, Brooksby I, Lenaghan E, Ashton K, Hay L, Smith R, Shepstone L, Lipp A, Daly C, Howe A, Hall R, Harvey I. Effectiveness of visits from community pharmacists for patients with heart failure: HeartMed randomised controlled trial. *BMJ* 2007; **334**:1098.
12. Korajkic A, Poole SG, MacFarlane LM, Bergin PJ, Dooley MJ. Impact of a Pharmacist Intervention on Ambulatory Patients with Heart Failure: A Randomised Controlled Study. *J Pharm Pract Research* 2011; **41**:126–131.
13. Lee KK, Thomas RC, Tan TC, Leong TK, Steimle A, Go AS. The Heart Failure Readmission Intervention by Variable Early Follow-up (THRIVE) Study: A Pragmatic Randomized Trial. *Circ Cardiovasc Qual Outcomes* 2020; **13**:e006553.
14. Linné AB, Liedholm H, Israelsson B. Effects of systematic education on heart failure patients' knowledge after 6 months. A randomised, controlled trial. *Eur. J. Heart Fail.* 1999; **1**:219–227.

15. López Cabezas C, Falces Salvador C, Cubí Quadrada D, Arnau Bartés A, Ylla Boré M, Muro Perea N, Homs Peipoch E. Randomized clinical trial of a postdischarge pharmaceutical care program vs regular follow-up in patients with heart failure. *Farm Hosp* 2006; **30**:328–342.
16. Lowrie R, Mair FS, Greenlaw N, Forsyth P, Jhund PS, McConnachie A, Rae B, McMurray, John J. V. Pharmacist intervention in primary care to improve outcomes in patients with left ventricular systolic dysfunction. *Eur Heart J* 2012; **33**:314–324.
17. McCarren M, Furmaga E, Jackevicius CA, Sahay A, Coppler TL, Katzianer J, Griffiths RL, Tonnu-Mihara I, Heidenreich P. Improvement of guideline  $\beta$ -blocker prescribing in heart failure: a cluster-randomized pragmatic trial of a pharmacy intervention. *J Card Fail* 2013; **19**:525–532.
18. Murray MD, Young J, Hoke S, Tu W, Weiner M, Morrow D, Stroupe KT, Wu J, Clark D, Smith F, Gradus-Pizlo I, Weinberger M, Brater DC. Pharmacist intervention to improve medication adherence in heart failure: a randomized trial. *Ann. Intern. Med.* 2007; **146**:714–725.
19. Sadik A, Yousif M, McElnay JC. Pharmaceutical care of patients with heart failure. *Br J Clin Pharmacol* 2005; **60**:183–193.
20. Schulz M, Griese-Mammen N, Anker SD, Koehler F, Ihle P, Ruckes C, Schumacher PM, Trenk D, Böhm M, Laufs U. Pharmacy-based interdisciplinary intervention for patients with chronic heart failure: Results of the PHARM-CHF randomized controlled trial. *Eur. J. Heart Fail.* 2019; **21**:1012–1021.
21. Stewart S, Pearson S, Horowitz JD. Effects of a home-based intervention among patients with congestive heart failure discharged from acute hospital care. *Arch. Intern. Med.* 1998; **158**:1067–1072.
22. Triller DM, Hamilton RA. Effect of pharmaceutical care services on outcomes for home care patients with heart failure. *Am J Health Syst Pharm* 2007; **64**:2244–2249.
23. Tsuyuki RT, Fradette M, Johnson JA, Bungard TJ, Eurich DT, Ashton T, Gordon W, Ikuta R, Kornder J, Mackay E, Manyari D, O'Reilly K, Semchuk W. A multicenter disease management program for hospitalized patients with heart failure. *J Card Fail* 2004; **10**:473–480.
24. Varma S, McElnay JC, Hughes CM, Passmore AP, Varma M. Pharmaceutical care of patients with congestive heart failure: interventions and outcomes. *Pharmacotherapy* 1999; **19**:860–869.
